# Supplementary material for: IgE-activated basophils regulate eosinophil tissue entry by modulating endothelial function
Source: PubMed Central journal article supplement — J Exp Med. 2015 Apr 6;212(4):513–24. doi: 10.1084/jem.20141671 (PMC4387286; doi:10.1084/jem.20141671), 2015-04-06
Supplement: supp_jem.20141671_JEM_20141671_sm.pdf [file supp_jem.20141671_JEM_20141671_sm.pdf]

## SUPPLEMENTAL MATERIAL

Cheng et al., <http://www.jem.org/cgi/content/full/jem.20141671/DC1>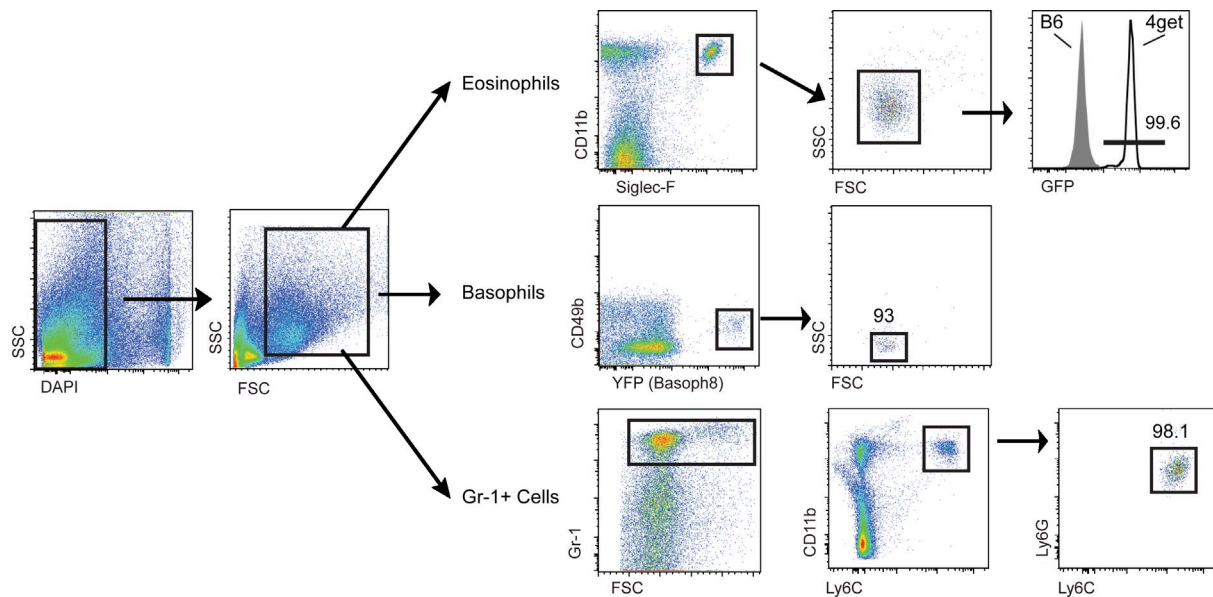

**Figure S1. Gating scheme for eosinophils ( $FSC^loSSC^hiCD11b^+Siglec-F^+$ ), basophils ( $FSC^loSSC^loCD49b^+YFP^+$ ), and Gr-1<sup>+</sup> cells on day 3 after challenge.** For eosinophils, the histograms at the right reveals uniform expression of GFP of Siglec-F<sup>+</sup>CD11b<sup>+</sup>FSC<sup>lo</sup>SSC<sup>hi</sup> cells when derived from 4get mice (Mohrs et al., 2001). For Gr-1<sup>+</sup> cells, parallel examination of ear suspensions revealed that most all of these cells were neutrophils because Ly6C<sup>+</sup> cells were also Ly6G<sup>+</sup>.

## REFERENCE

Mohrs, M., K. Shinkai, K. Mohrs, and R.M. Locksley. 2001. Analysis of type 2 immunity in vivo with a bicistronic IL-4 reporter. *Immunity*. 15:303–311. [http://dx.doi.org/10.1016/S1074-7613\(01\)00186-8](http://dx.doi.org/10.1016/S1074-7613(01)00186-8)
